# Supplementary material
Source: publisher figshare collection journal article supplement (https://acs.figshare.com/ndownloader/files/4073572)
Supplement: Supplementary file 1 [file 4073572]

## SUPPLEMENTAL INFORMATION

### Temperature Dependence of Polymer Diffusion in MWCNT/PS Nanocomposites

Wei-Shao Tung,<sup>1</sup> Nigel Clarke,<sup>2</sup> Russell J. Composto,<sup>1</sup> Karen I. Winey\*,<sup>1</sup>

<sup>1</sup>Department of Materials Science and Engineering, University of Pennsylvania

<sup>2</sup>Department of Physics and Astronomy, University of Sheffield

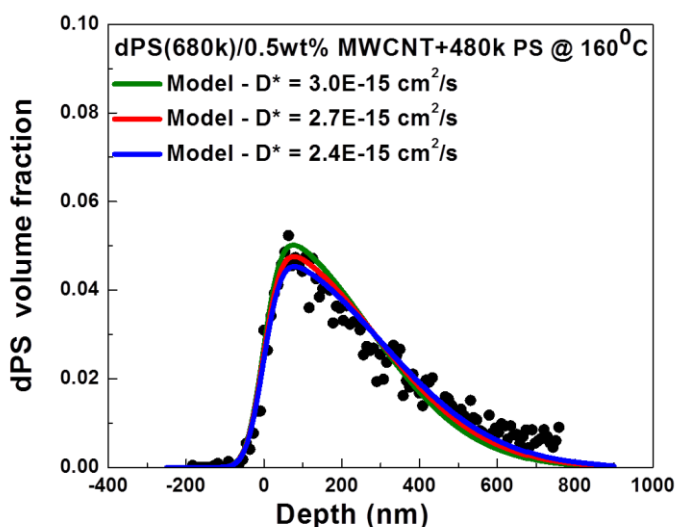

**Figure S1.** The depth profile of 680k dPS partially diffused into 0.5wt% MWCNT/PS nanocomposites after annealing at 160 °C for 40 hours. Lines correspond to the convolution of a Gaussian function and Eq. 3, where  $h = 18$  nm and three different diffusion coefficients as given in the figure. This figure illustrates the uncertainty in fitting the diffusion coefficients using the depth profile with the convolution of Fick's second law and a Gaussian function. The uncertainty is about 10 %. The diffusion coefficients we obtained from the fitting is  $2.7\text{E-}15$   $\text{cm}^2/\text{s}$ , and  $\pm 10$  % of that diffusion coefficient still provide relatively good fits.

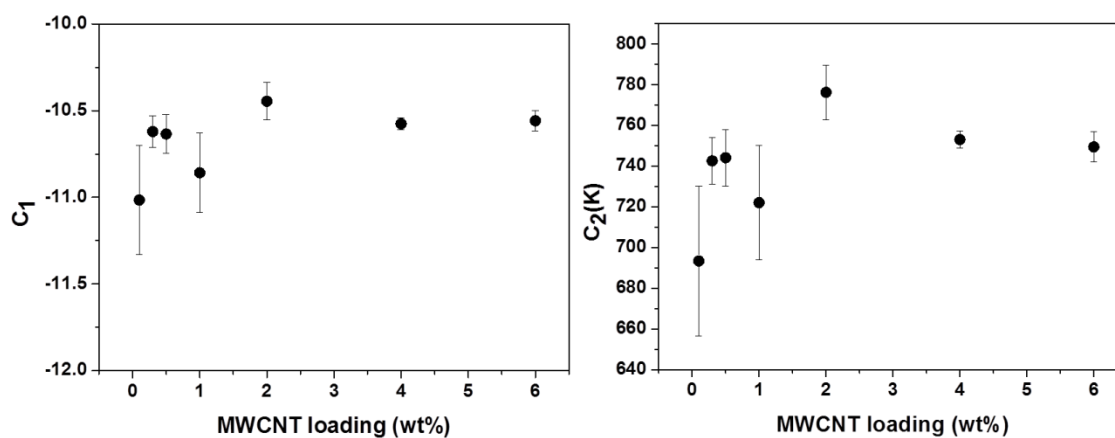

**Figure S2.** Fitting results for  $C_1$  and  $C_2$  for all MWCNT concentrations, except 0.7 wt%. We include results from samples with 0.1 and 1 wt % MWCNT although the temperature range studied is narrower and, consequently, the error bars are larger. At 0.7 wt%, the temperature range is too narrow (only  $\sim 20^\circ\text{C}$ ) to have reliable fitting results. As can be seen in the figure,  $C_1$  is approximately constant across the whole concentration, and  $C_2$  shows a slight maximum at 2wt%.
